# Supplementary material for: Defining the key intrahepatic gene networks in HCV infection driven by sex
Source: PubMed Central journal article supplement — Gut. 2022 May 25;72(5):984–94. doi: 10.1136/gutjnl-2021-326314 (PMC10086281; doi:10.1136/gutjnl-2021-326314), 2022-05-25
Supplement: gutjnl-2021-326314supp005.pdf [file gutjnl-2021-326314supp005.pdf]

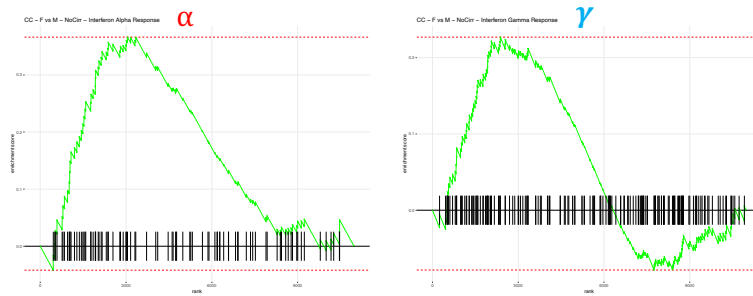

## CC – F vs M - Noncirrhotic

| Pathway                                     | F | Gene ranks | M | NES  | pval    | padj    |
|---------------------------------------------|---|------------|---|------|---------|---------|
| $\alpha$ HALLMARK_INTERFERON_ALPHA_RESPONSE |   |            |   | 1.51 | 8.2e-03 | 5.8e-02 |
| HALLMARK_KRAS_SIGNALING_DN                  |   |            |   | 1.41 | 3.9e-02 | 1.2e-01 |
| HALLMARK_MYC_TARGETS_V2                     |   |            |   | 1.36 | 6.6e-02 | 1.6e-01 |
| HALLMARK_BILE_ACID_METABOLISM               |   |            |   | 1.32 | 7.2e-02 | 1.7e-01 |
| HALLMARK_XENOBIOTIC_METABOLISM              |   |            |   | 1.32 | 4.0e-02 | 1.2e-01 |
| HALLMARK_IL2_STAT5_SIGNALING                |   |            |   | 1.29 | 6.6e-02 | 1.6e-01 |
| HALLMARK_COAGULATION                        |   |            |   | 1.27 | 9.9e-02 | 2.2e-01 |
| HALLMARK_GLYCOLYSIS                         |   |            |   | 1.20 | 1.4e-01 | 3.0e-01 |
| HALLMARK_HYPOXIA                            |   |            |   | 1.19 | 1.6e-01 | 3.3e-01 |
| HALLMARK_MITOTIC_SPINDLE                    |   |            |   | 1.16 | 2.0e-01 | 3.4e-01 |
| HALLMARK_PEROXISOME                         |   |            |   | 1.16 | 2.1e-01 | 3.4e-01 |
| HALLMARK_NOTCH_SIGNALING                    |   |            |   | 1.09 | 3.3e-01 | 4.8e-01 |
| $\gamma$ HALLMARK_INTERFERON_GAMMA_RESPONSE |   |            |   | 1.04 | 4.0e-01 | 5.6e-01 |
| HALLMARK_CHOLESTEROL_HOMEOSTASIS            |   |            |   | 1.02 | 4.3e-01 | 5.8e-01 |
| HALLMARK_MYOGENESIS                         |   |            |   | 0.99 | 4.6e-01 | 6.1e-01 |

a

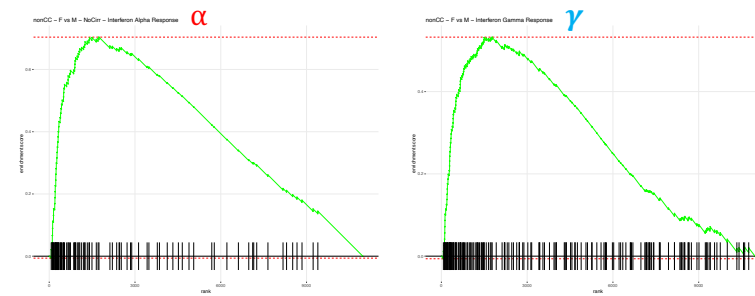

## nonCC – F vs M - Noncirrhotic

| Pathway                                     | F | Gene ranks | M | NES  | pval    | padj    |
|---------------------------------------------|---|------------|---|------|---------|---------|
| $\alpha$ HALLMARK_INTERFERON_ALPHA_RESPONSE |   |            |   | 2.79 | 2.7e-18 | 1.3e-16 |
| $\gamma$ HALLMARK_INTERFERON_GAMMA_RESPONSE |   |            |   | 2.35 | 5.8e-13 | 1.4e-11 |
| HALLMARK_CHOLESTEROL_HOMEOSTASIS            |   |            |   | 1.48 | 1.8e-02 | 1.9e-01 |
| HALLMARK_FATTY_ACID_METABOLISM              |   |            |   | 1.42 | 3.3e-02 | 1.9e-01 |
| HALLMARK_KRAS_SIGNALING_DN                  |   |            |   | 1.42 | 3.9e-02 | 1.9e-01 |
| HALLMARK_IL2_STAT5_SIGNALING                |   |            |   | 1.39 | 3.5e-02 | 1.9e-01 |
| HALLMARK_GLYCOLYSIS                         |   |            |   | 1.38 | 3.3e-02 | 1.9e-01 |
| HALLMARK_UNFOLDED_PROTEIN_RESPONSE          |   |            |   | 1.35 | 5.3e-02 | 2.3e-01 |
| HALLMARK_PEROXISOME                         |   |            |   | 1.32 | 7.7e-02 | 3.2e-01 |
| HALLMARK_BILE_ACID_METABOLISM               |   |            |   | 1.23 | 1.4e-01 | 4.6e-01 |
| HALLMARK_NOTCH_SIGNALING                    |   |            |   | 1.20 | 2.2e-01 | 5.6e-01 |
| HALLMARK_MTORC1_SIGNALING                   |   |            |   | 1.19 | 1.2e-01 | 4.6e-01 |
| HALLMARK_XENOBIOTIC_METABOLISM              |   |            |   | 1.17 | 1.6e-01 | 4.6e-01 |
| HALLMARK_MYOGENESIS                         |   |            |   | 1.14 | 2.3e-01 | 5.6e-01 |
| HALLMARK_INFLAMMATORY_RESPONSE              |   |            |   | 1.14 | 2.2e-01 | 5.6e-01 |

b
