# Supplementary material for: Defining the key intrahepatic gene networks in HCV infection driven by sex
Source: PubMed Central journal article supplement — Gut. 2022 May 25;72(5):984–94. doi: 10.1136/gutjnl-2021-326314 (PMC10086281; doi:10.1136/gutjnl-2021-326314), 2022-05-25
Supplement: gutjnl-2021-326314supp006.pdf [file gutjnl-2021-326314supp006.pdf]

GSEA - Noncirrhotic – CC samples

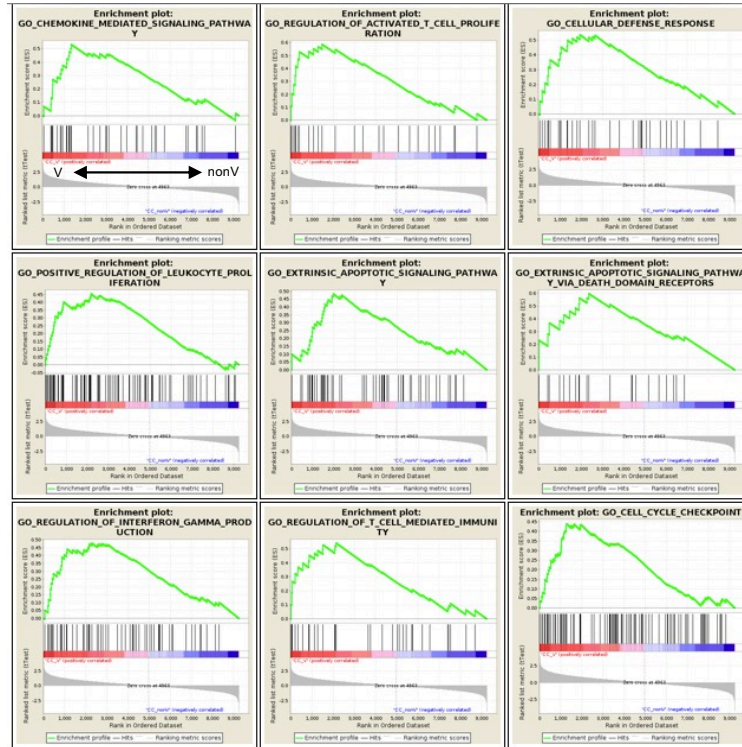

a

Noncirrhotic samples - V vs non V at pos2580

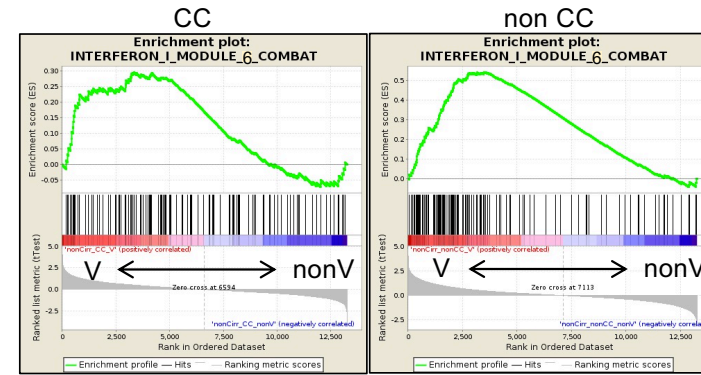

b

Variant effect for module 4-7

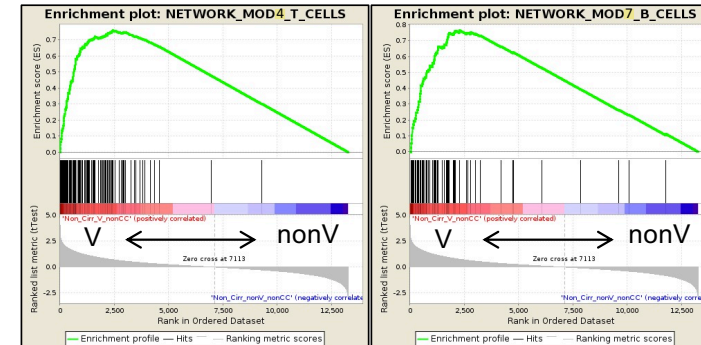

c
