# Supplementary figures and images for: Defining the key intrahepatic gene networks in HCV infection driven by sex
Source: PubMed Central journal article supplement — Gut. 2022 May 25;72(5):984–94. doi: 10.1136/gutjnl-2021-326314 (PMC10086281; doi:10.1136/gutjnl-2021-326314), 2022-05-25

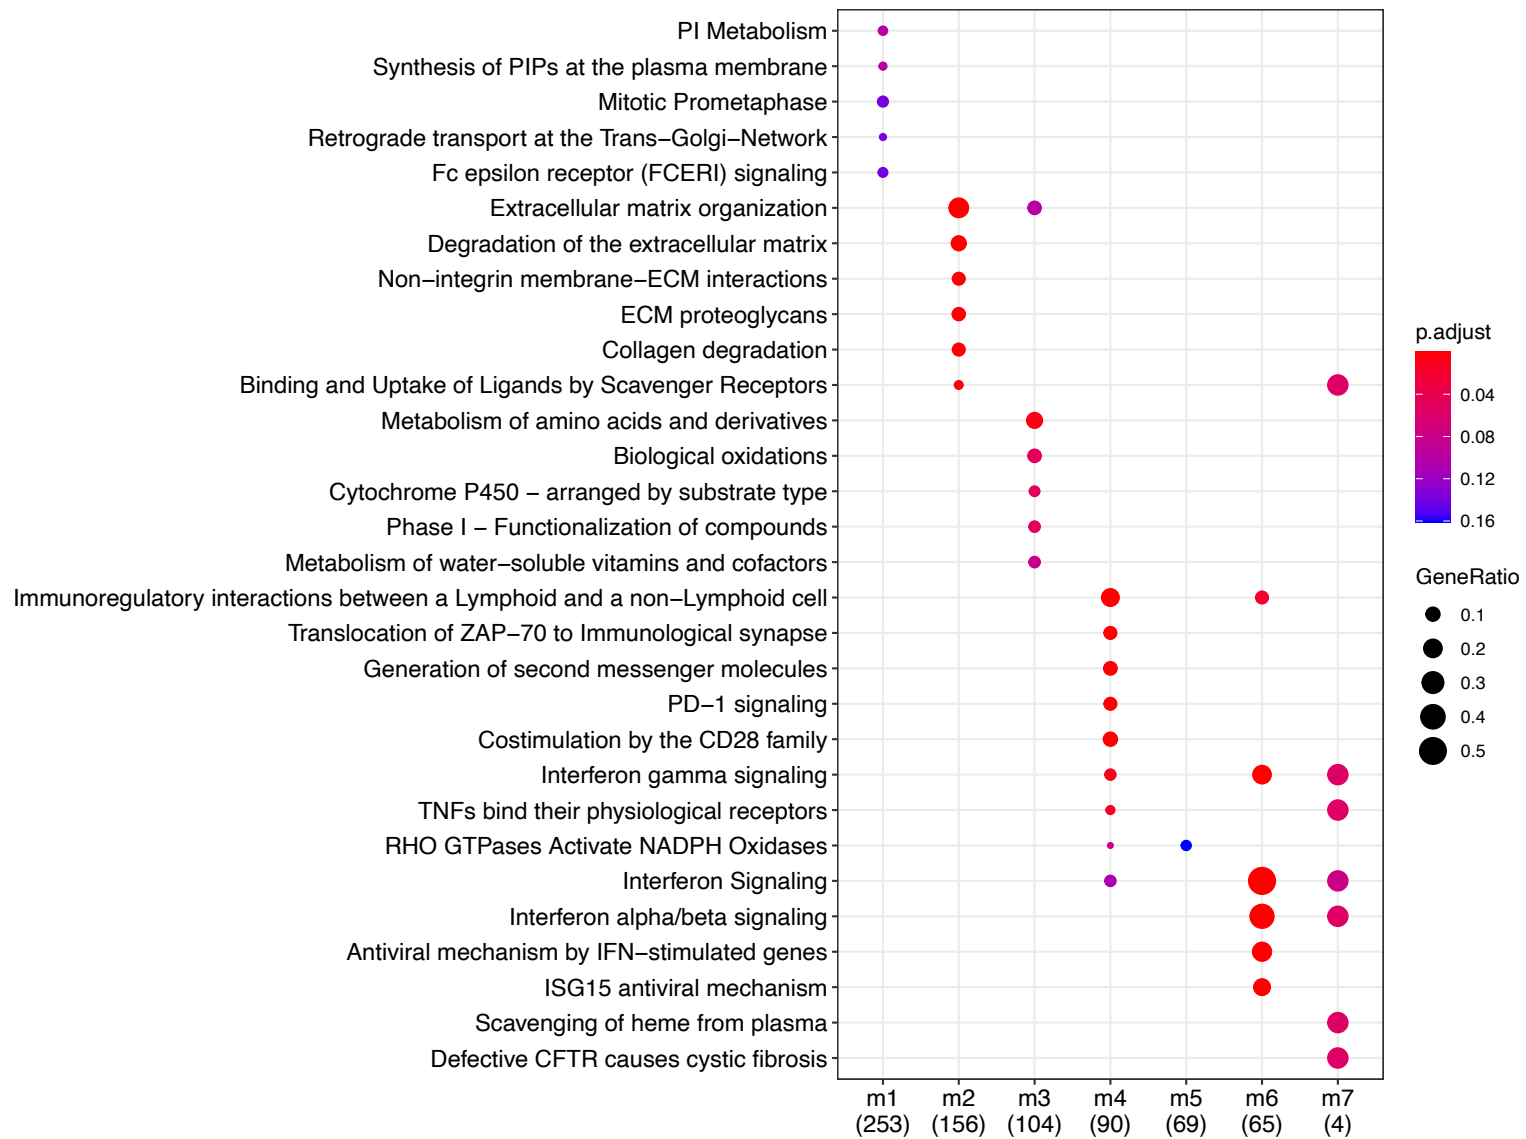

Supplement: gutjnl-2021-326314supp002.pdf [file gutjnl-2021-326314supp002.pdf]

## Sample PCA using expressions of m2 genes

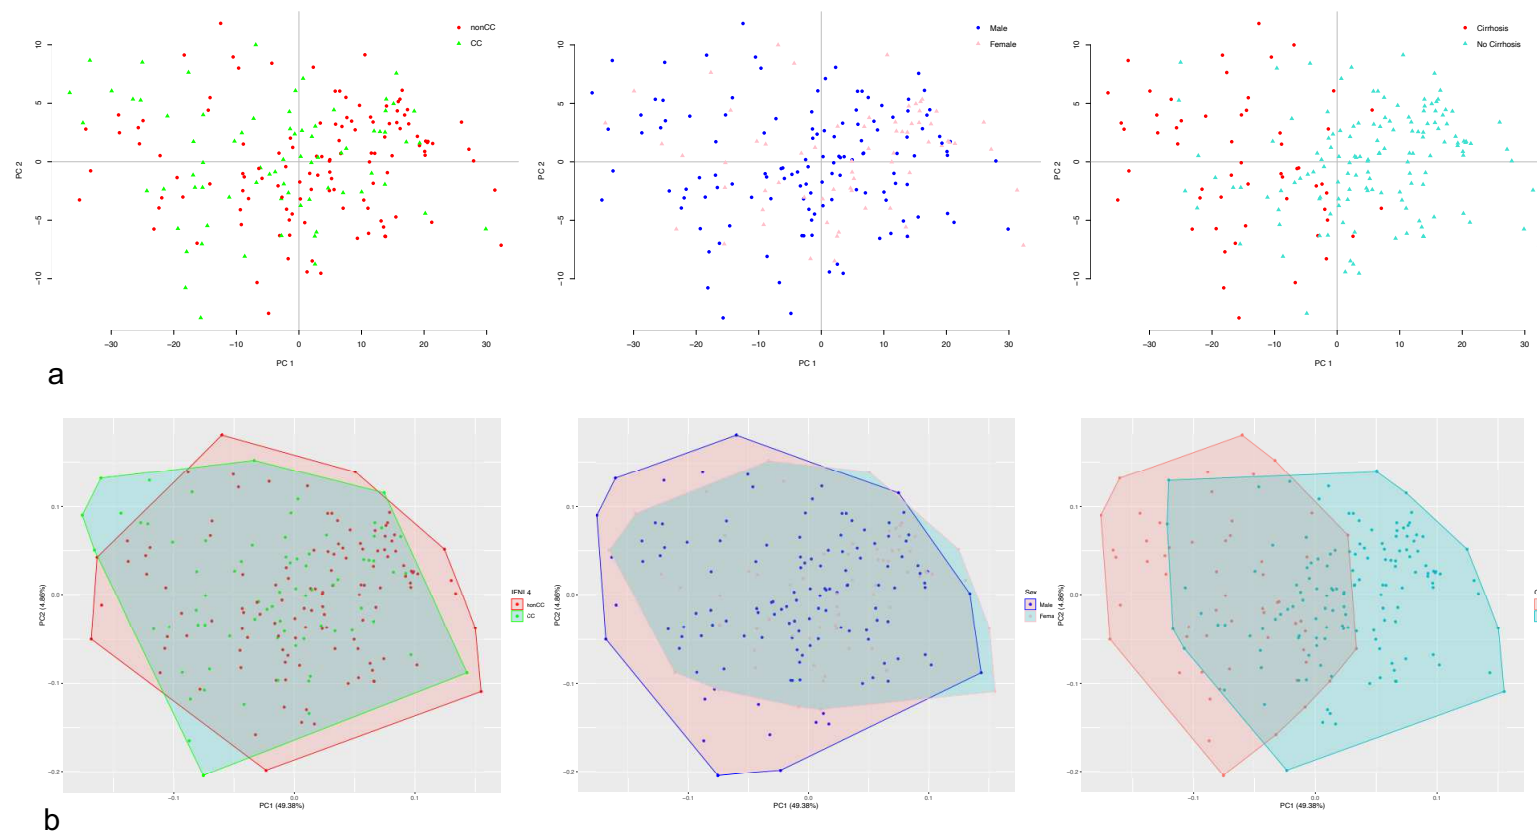

Supplement: gutjnl-2021-326314supp003.pdf [file gutjnl-2021-326314supp003.pdf]

## Sample PCA using expressions of m6 genes

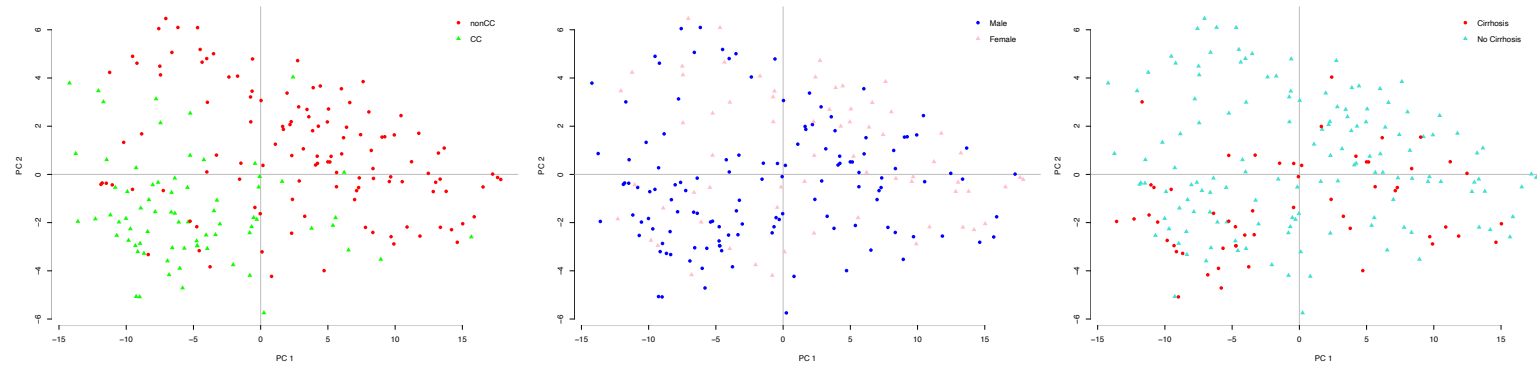

a

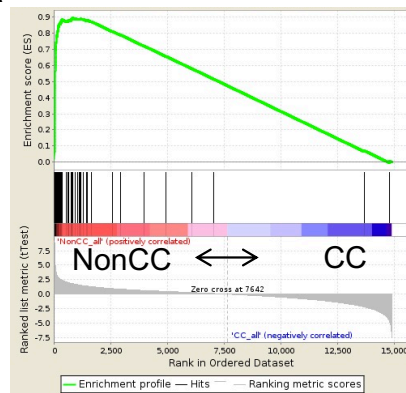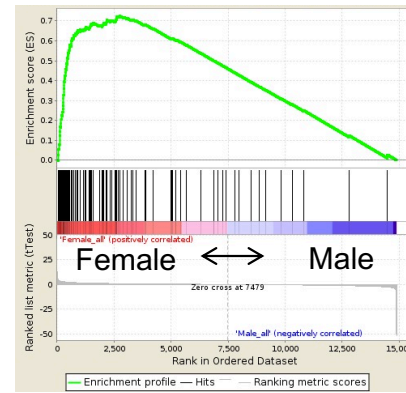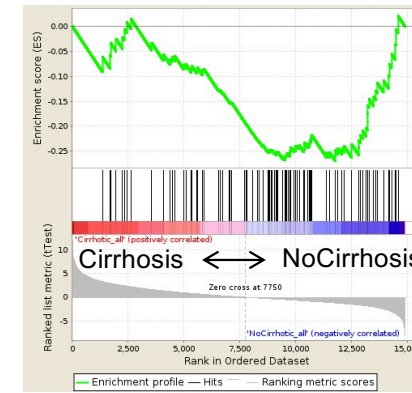

b

Supplement: gutjnl-2021-326314supp004.pdf [file gutjnl-2021-326314supp004.pdf]

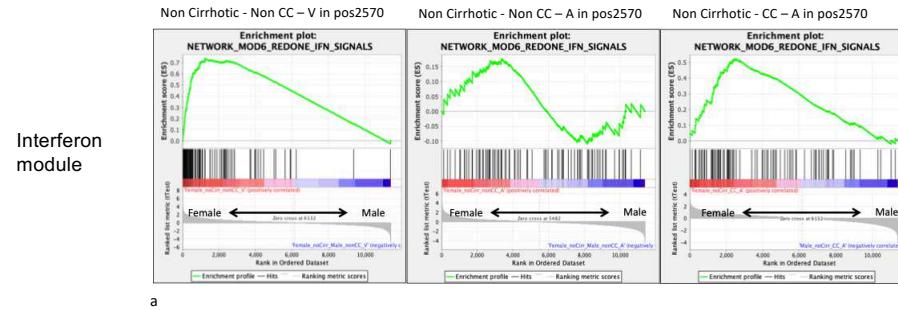

a

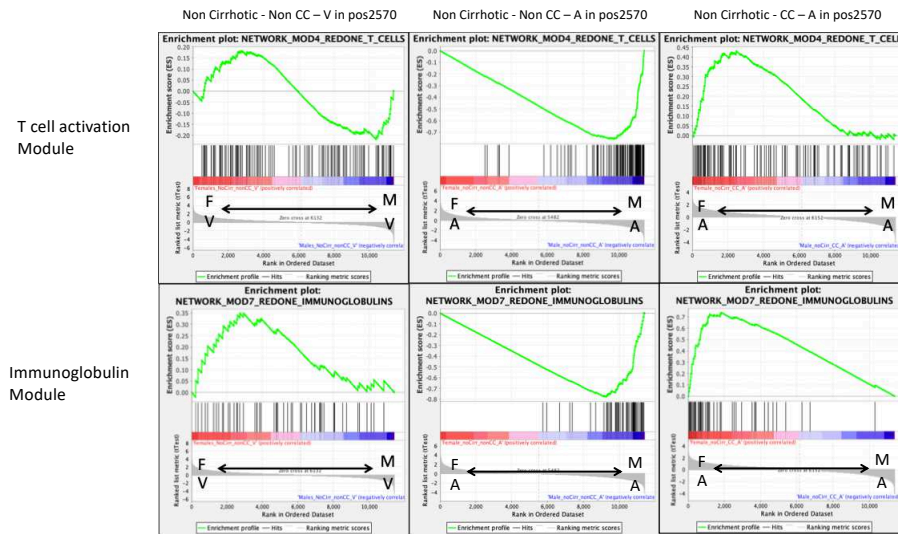

b

CibersortX Cells signatures enrichment (no Cirr-nonCC-V)

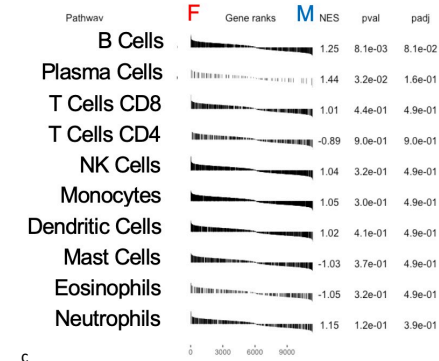

c

Supplement: gutjnl-2021-326314supp007.pdf [file gutjnl-2021-326314supp007.pdf]

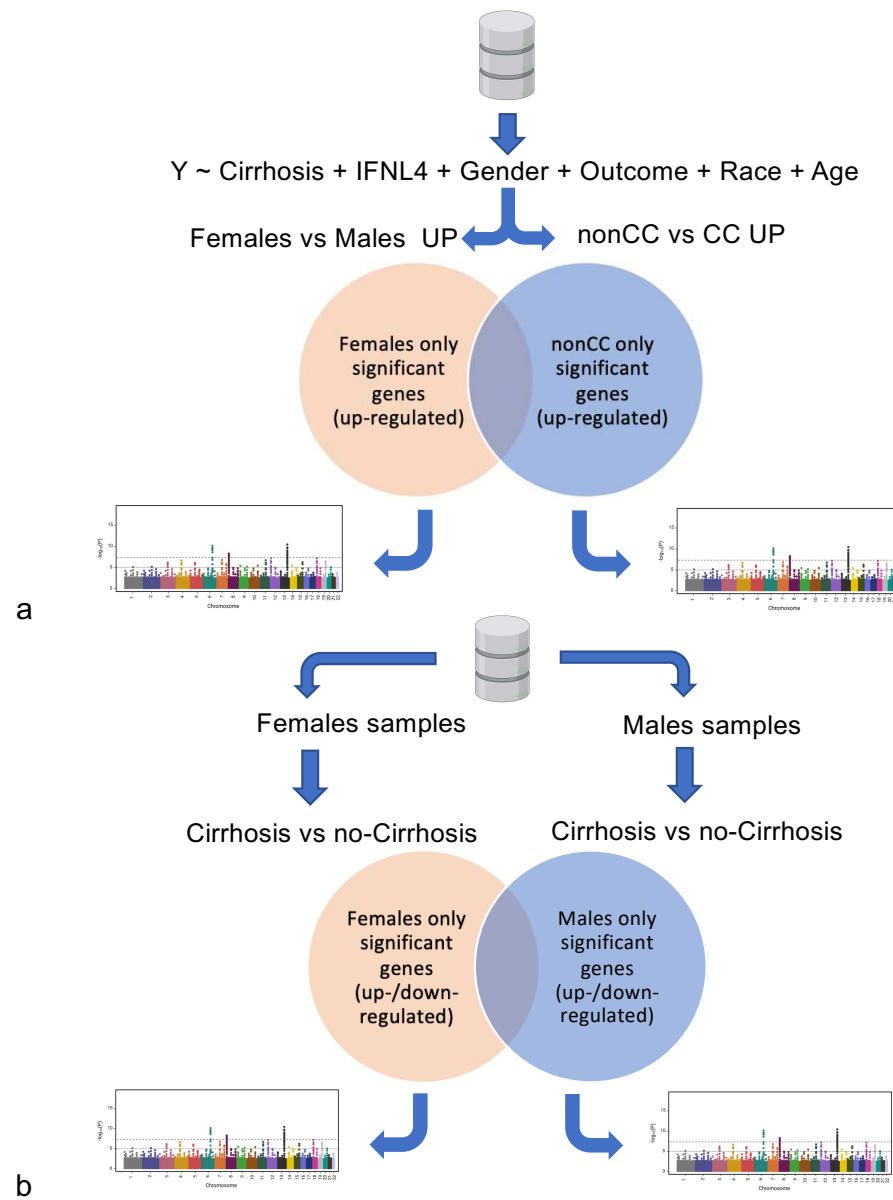

Supplement: gutjnl-2021-326314supp008.pdf [file gutjnl-2021-326314supp008.pdf]

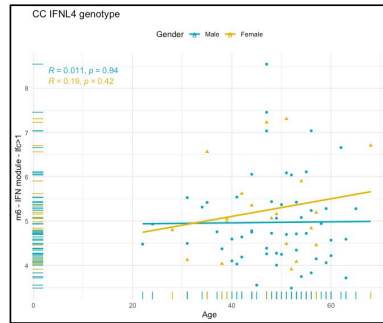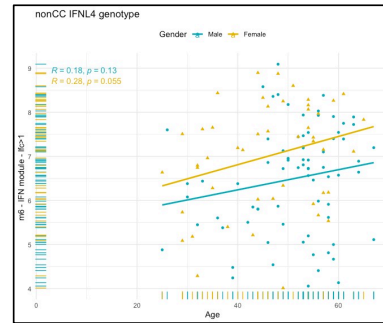

a

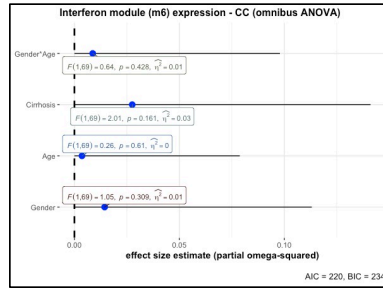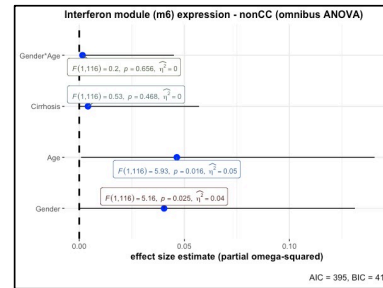

b

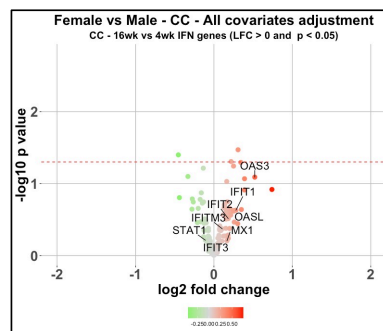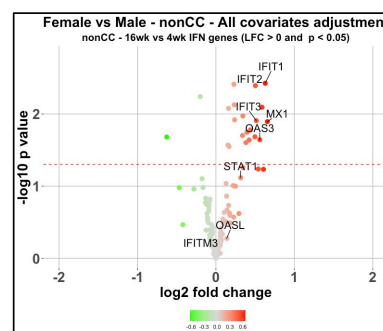

d

Module 6  
(Interferon)

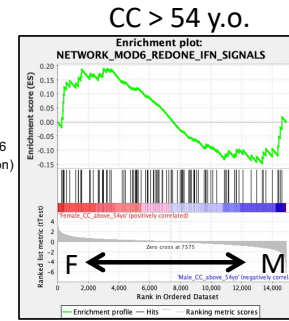

nonCC > 54 y.o.

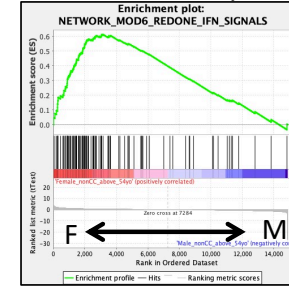

Module 4  
(T cells)

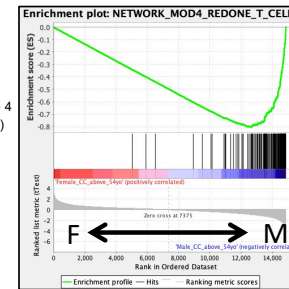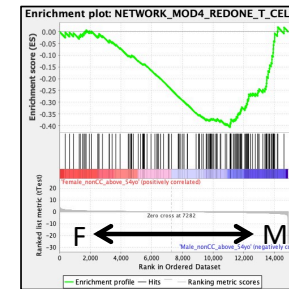

Module 7  
(Immunogl.)

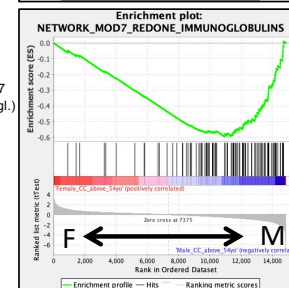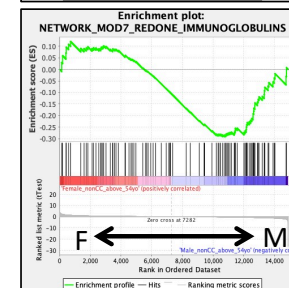

c

Supplement: gutjnl-2021-326314supp009.pdf [file gutjnl-2021-326314supp009.pdf]

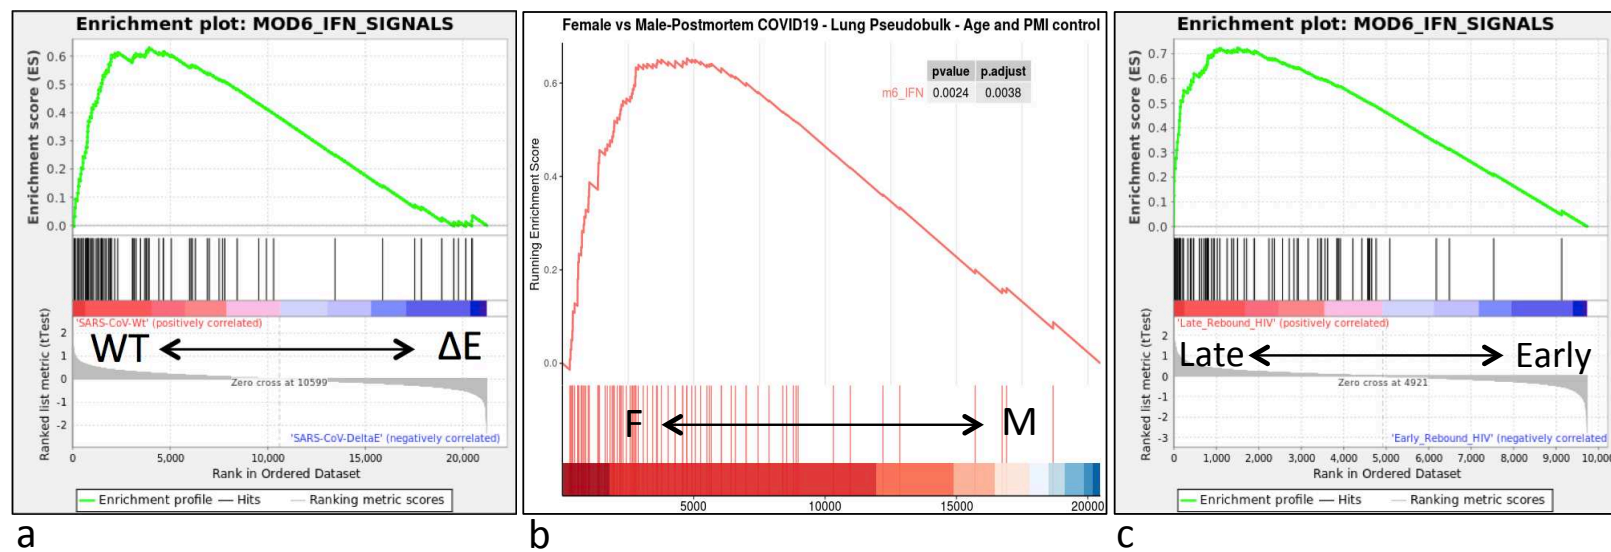

Supplement: gutjnl-2021-326314supp010.pdf [file gutjnl-2021-326314supp010.pdf]
